# Supplementary material
Source: PubMed Central journal article supplement (PMC3252357)
Supplement: supp_139.3.612_DEV075614TableS1.pdf [file supp_139.3.612_DEV075614TableS1.pdf]

**Table S1. Subcellular localization of Smo C-to-A mutants**

|                   | Vesicular  | ER          | Plasma membrane |
|-------------------|------------|-------------|-----------------|
| Myc-Smo           | 86.6 ±1.3% | 10.93±1.43% | 2.5±1.7%        |
| Myc-Smo + Hh      | 7.8±1.7%   | 11.55±1.34% | 80.41±2.30%     |
| Myc-SmoC320A      | 0          | 100%        | 0               |
| Myc-SmoC320A + Hh | 0          | 100%        | 0               |
| Myc-SmoC339A      | 0          | 100%        | 0               |
| Myc-SmoC339A + Hh | 0          | 100%        | 0               |
| Myc-SmoC413A      | 0          | 100%        | 0               |
| Myc-SmoC413A + Hh | 0          | 100%        | 0               |

Seven fields of cells over two individual experiments were examined for Smo colocalization with the Cal-GFP-KDEL marker. The percentage of cells demonstrating vesicular, plasma membrane or ER localization is indicated. Error is shown as s.e.m.
